# Supplementary material for: A case report of a 40-year-old woman with endomyocardial fibrosis in a non-tropical area: from initial presentation to high urgent heart transplantation
Source: Springer Nature journal article supplement (doi:10.1186/s12872-019-1243-8), 2019-12-01

Vermessungsergebnisse:

|           |   |                  |
|-----------|---|------------------|
| QRS       | : | 86 ms            |
| QT/QTcB   | : | 350 / 449 ms     |
| PQ        | : | 132 ms           |
| P         | : | 106 ms           |
| RR/PP     | : | 608 / 620 ms     |
| P/QRS/T   | : | 80/ 60/ -75 Grad |
| QTD/QTcBD | : | 70 / 90 ms       |
| Sokolow   | : | 1.6 mU           |
| NK        | : | 14               |

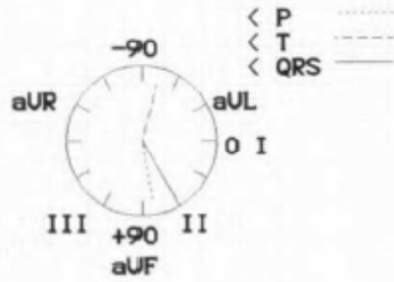

unbestätigter Bericht.

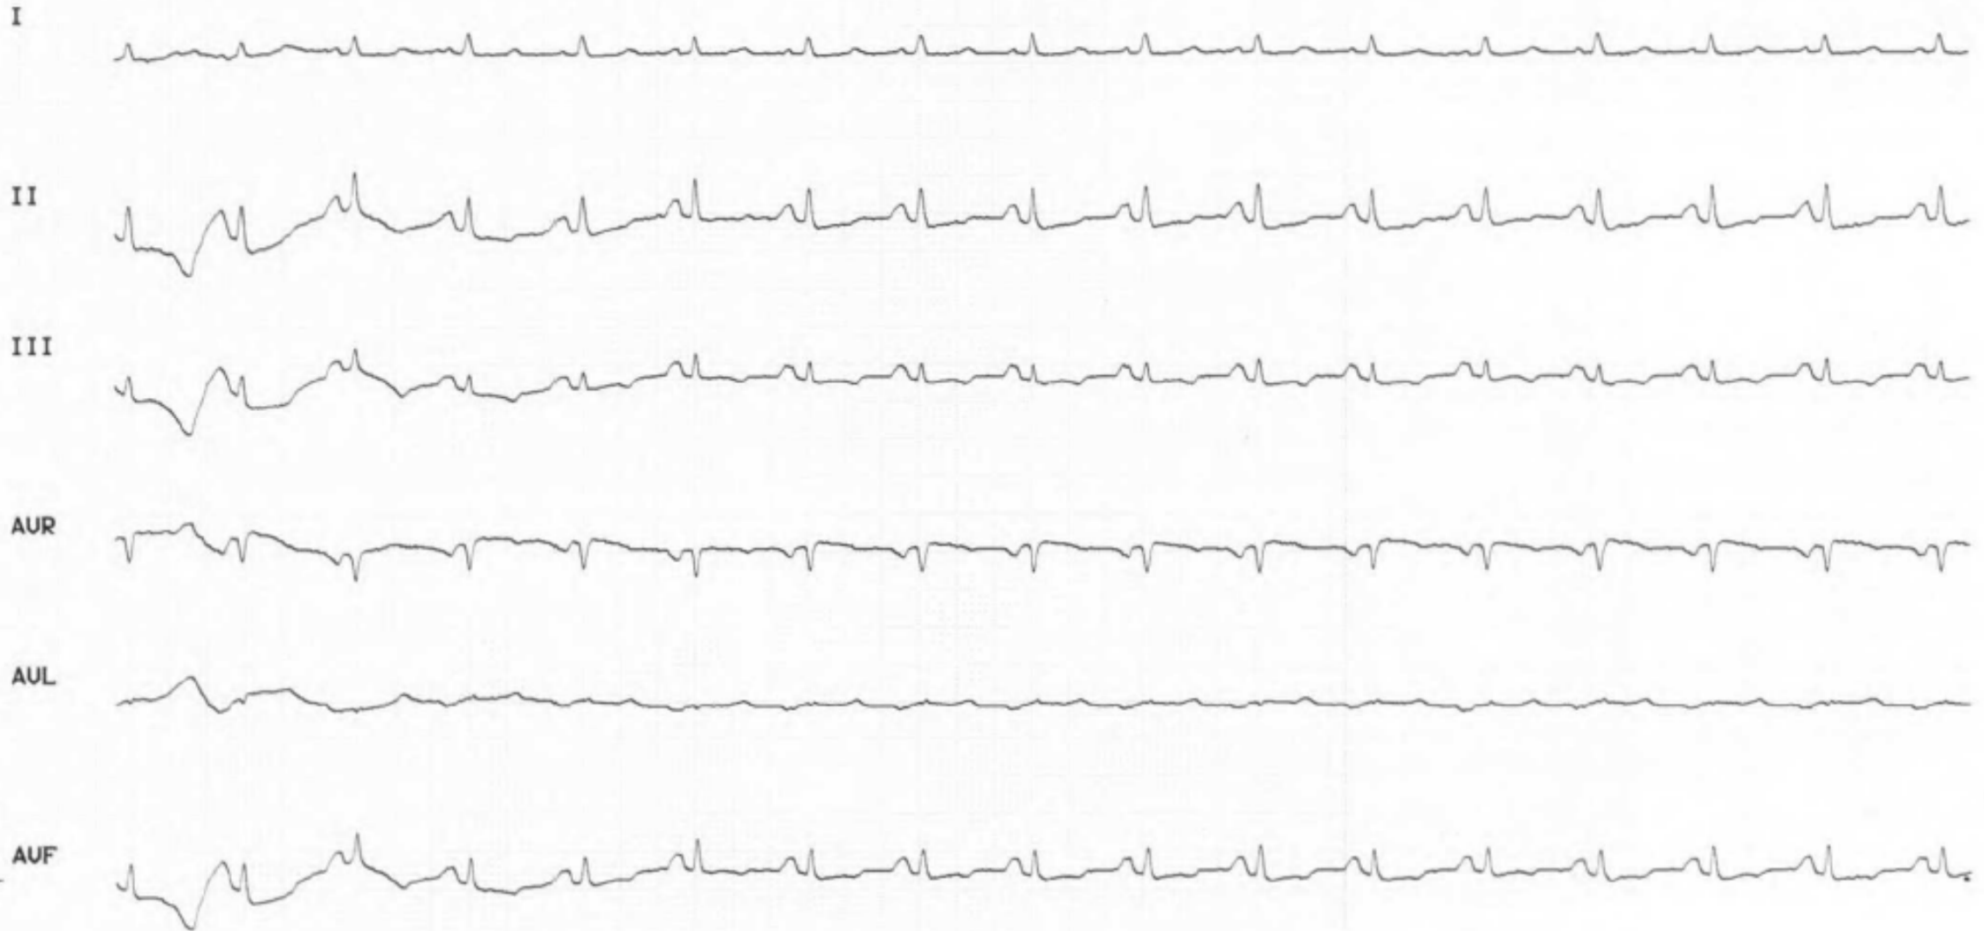

unbestätigter Bericht.

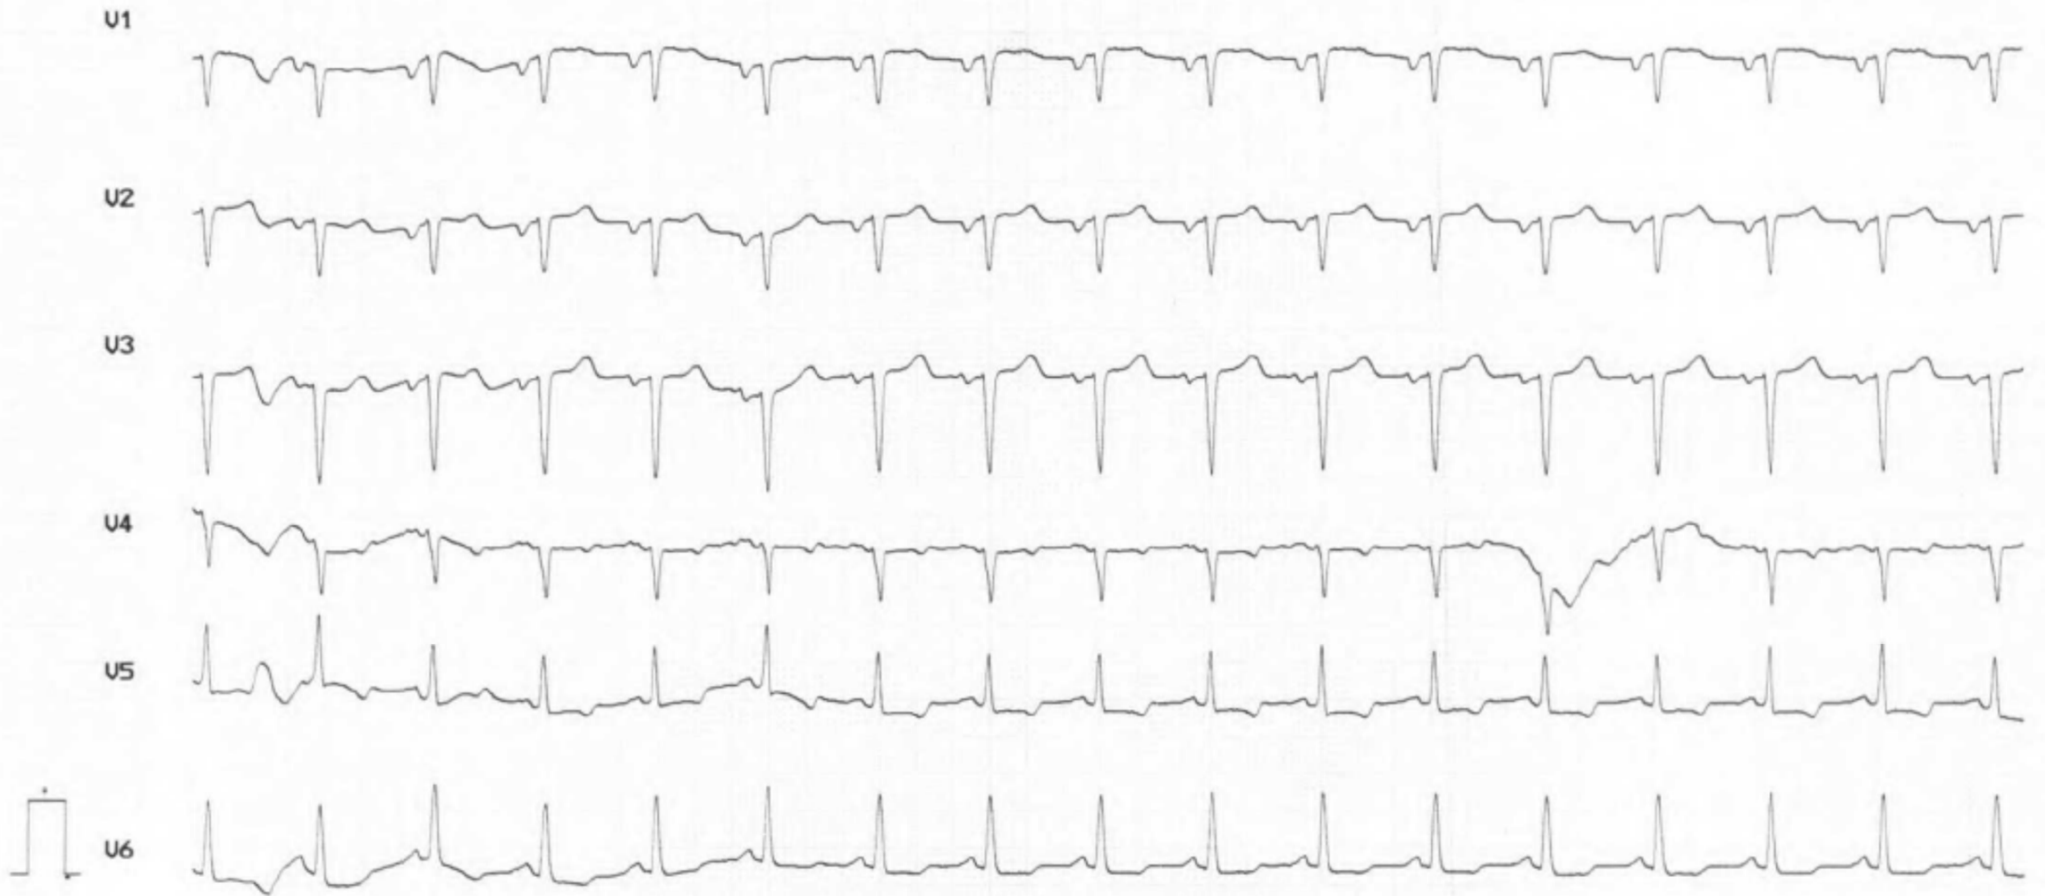

Supplement: MOESM1 [file 17660534]
