# Supplementary material for: A case report of a 40-year-old woman with endomyocardial fibrosis in a non-tropical area: from initial presentation to high urgent heart transplantation
Source: Springer Nature journal article supplement (doi:10.1186/s12872-019-1243-8), 2019-12-01

**Additional file 3.**

**Echocardiographic images from November 2011 showing  
(A) left atrial enlargement,  
(B) severe mitral regurgitation, and  
(C) apical endomyocardial fibrosis**

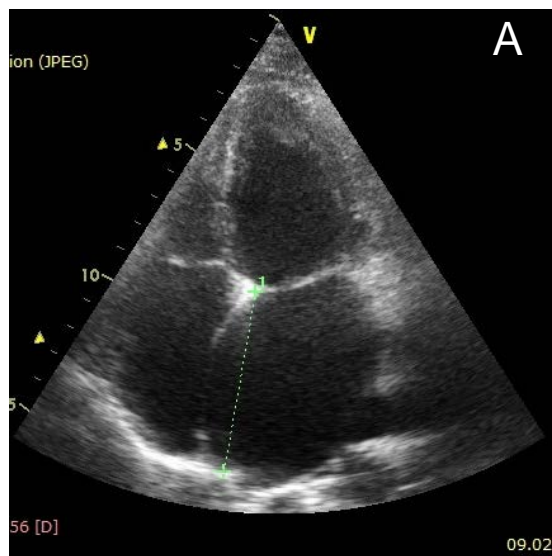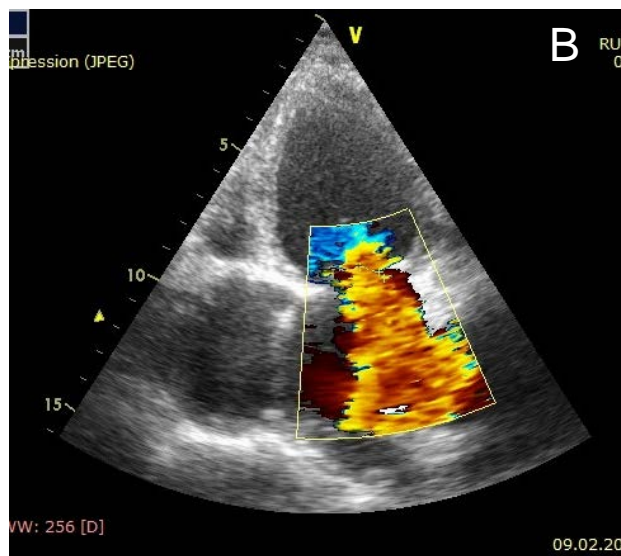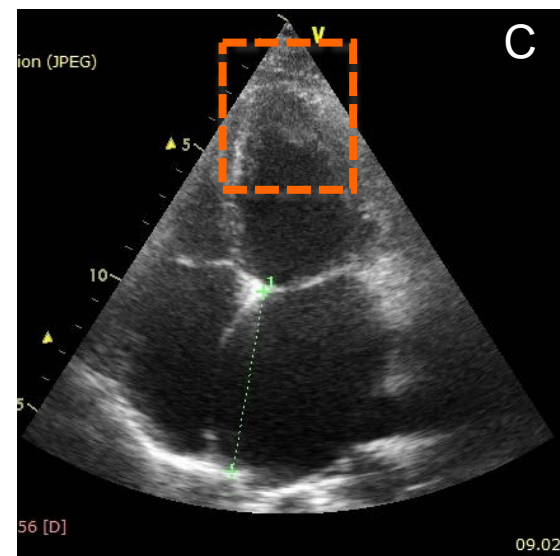

Supplement: MOESM2 [file 17660534]
