# Supplementary material for: A case report of a 40-year-old woman with endomyocardial fibrosis in a non-tropical area: from initial presentation to high urgent heart transplantation
Source: Springer Nature journal article supplement (doi:10.1186/s12872-019-1243-8), 2019-12-01

**Additional file 6.**

**Still image of left ventriculography, right anterior oblique (RAO) view**

**(A) Dashed line depicts original endocardial borders and apical contrast dye sparing due to EMF.**

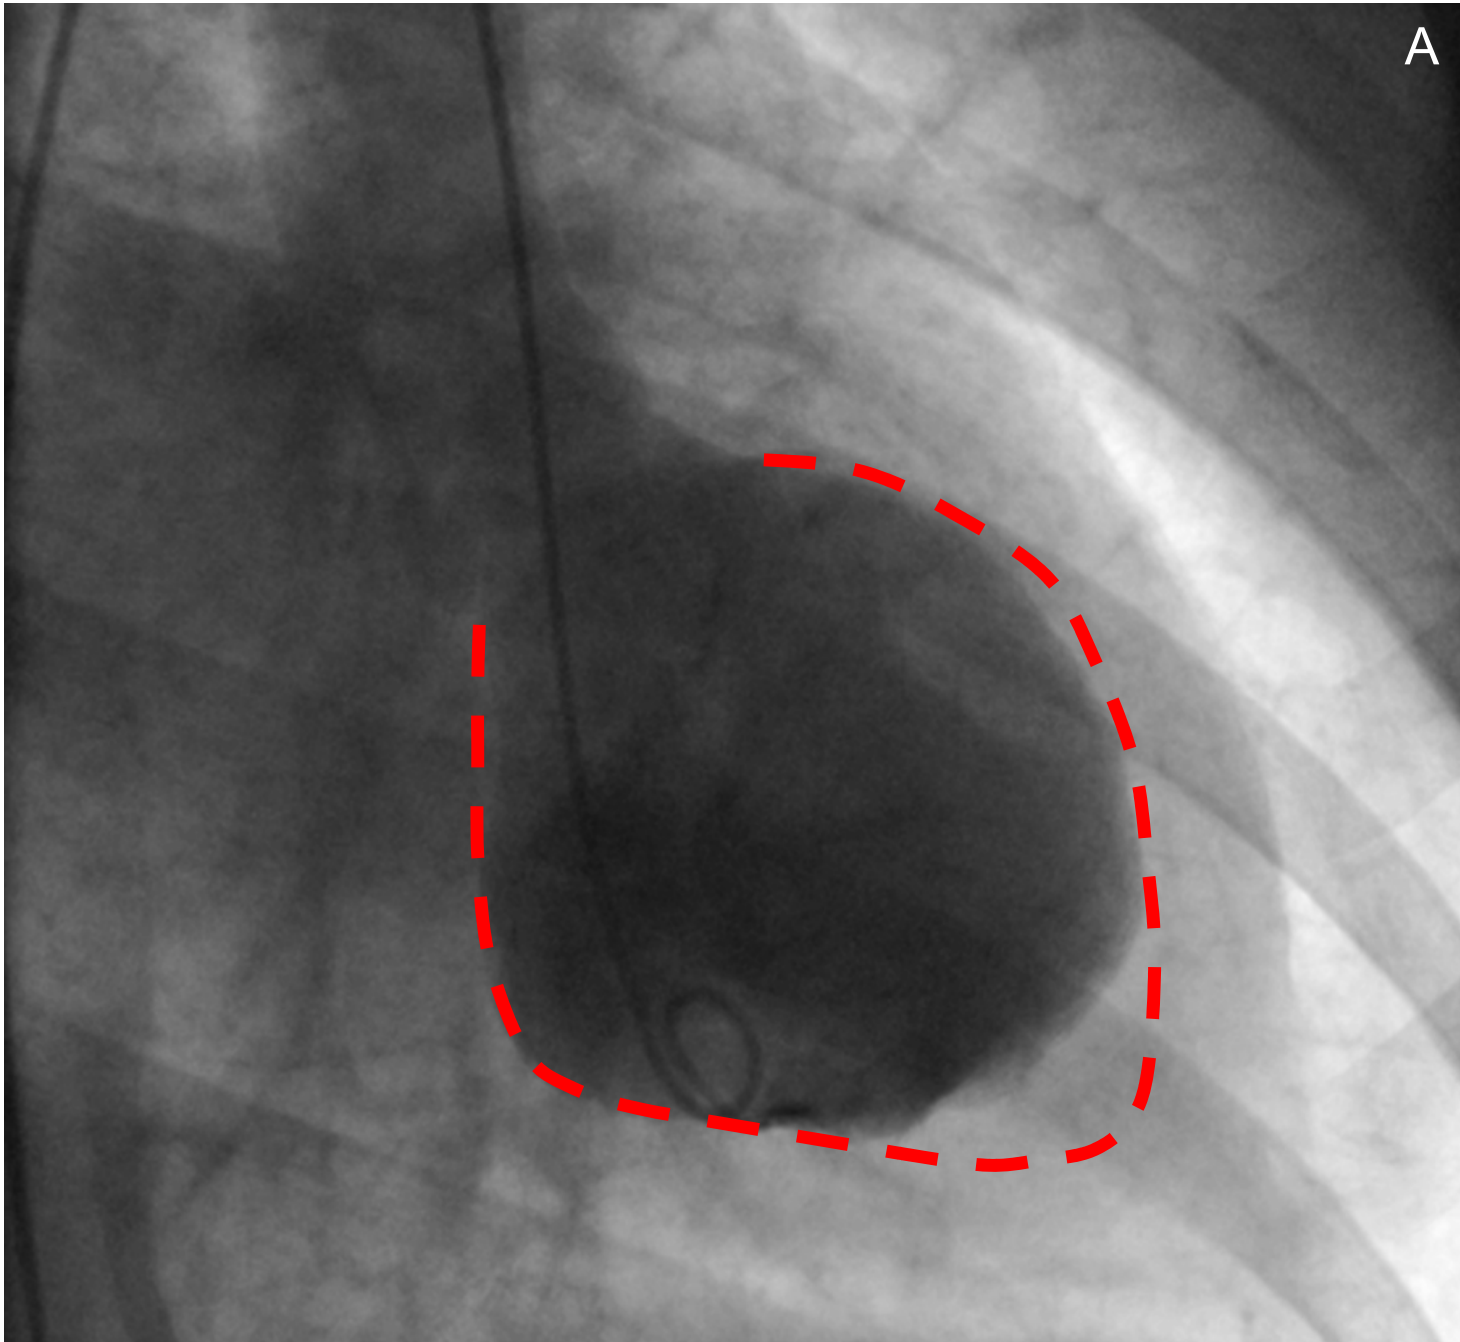

Supplement: MOESM5 [file 17660534]
